# Supplementary material
Source: PubMed Central journal article supplement (PMC2894525)
Supplement: NIHMS209492-supplement-4.pdf [file NIHMS209492-supplement-4.pdf]

| Table S1. V2 16S rRNA gene sequencing statistics from human donor and two generations of recipient humanized mice. |        |       |            |            |        |                        |           |
|--------------------------------------------------------------------------------------------------------------------|--------|-------|------------|------------|--------|------------------------|-----------|
| Sample                                                                                                             | Date   | Diet  | Donor Diet | Individual | Source | Donor                  | Sequences |
| PD2F.1.121107                                                                                                      | 121107 | Human | Human      | PD2        | Feces  | Donor                  | 2,612     |
| PD2F.2.121107                                                                                                      | 121107 | Human | Human      | PD2        | Feces  | Donor                  | 2,493     |
| PD2G.1.121107                                                                                                      | 121107 | Human | Human      | PD2        | Feces  | Donor                  | 3,307     |
| PD2G.12.11.07                                                                                                      | 121107 | Human | Human      | PD2        | Feces  | Donor                  | 7,676     |
| PD2G.4.121107                                                                                                      | 121107 | Human | Human      | PD2        | Feces  | Donor                  | 2,488     |
| PD2L.12.11.07                                                                                                      | 121107 | Human | Human      | PD2        | Feces  | Donor                  | 1,640     |
| PM1.12.11.07                                                                                                       | 121107 | LF/PP | Human      | PM1        | Feces  | Humanized generation 1 | 1,516     |
| PM10.12.11.07                                                                                                      | 121107 | LF/PP | Human      | PM10       | Feces  | Humanized generation 1 | 1,522     |
| PM11.12.11.07                                                                                                      | 121107 | LF/PP | Human      | PM11       | Feces  | Humanized generation 1 | 1,298     |
| PM2.12.11.07                                                                                                       | 121107 | LF/PP | Human      | PM2        | Feces  | Humanized generation 1 | 1,106     |
| PM3.12.11.07                                                                                                       | 121107 | LF/PP | Human      | PM3        | Feces  | Humanized generation 1 | 1,350     |
| PM5.12.11.07                                                                                                       | 121107 | LF/PP | Human      | PM5        | Feces  | Humanized generation 1 | 1,552     |
| PM7.12.11.07                                                                                                       | 121107 | LF/PP | Human      | PM7        | Feces  | Humanized generation 1 | 1,134     |
| PM8.12.11.07                                                                                                       | 121107 | LF/PP | Human      | PM8        | Feces  | Humanized generation 1 | 1,481     |
| PM9.12.11.07                                                                                                       | 121107 | LF/PP | Human      | PM9        | Feces  | Humanized generation 1 | 855       |
| PM1.121707                                                                                                         | 121707 | LF/PP | Human      | PM1        | Feces  | Humanized generation 1 | 3,577     |
| PM10.121707                                                                                                        | 121707 | LF/PP | Human      | PM10       | Feces  | Humanized generation 1 | 5,815     |
| PM11.121707                                                                                                        | 121707 | LF/PP | Human      | PM11       | Feces  | Humanized generation 1 | 1,975     |
| PM12.121707                                                                                                        | 121707 | LF/PP | Human      | PM12       | Feces  | Humanized generation 1 | 2,570     |
| PM2.121707                                                                                                         | 121707 | LF/PP | Human      | PM2        | Feces  | Humanized generation 1 | 1,743     |
| PM3.121707                                                                                                         | 121707 | LF/PP | Human      | PM3        | Feces  | Humanized generation 1 | 5,792     |
| PM4.121707                                                                                                         | 121707 | LF/PP | Human      | PM4        | Feces  | Humanized generation 1 | 1,874     |
| PM5.121707                                                                                                         | 121707 | LF/PP | Human      | PM5        | Feces  | Humanized generation 1 | 2,130     |
| PM6.121707                                                                                                         | 121707 | LF/PP | Human      | PM6        | Feces  | Humanized generation 1 | 2,290     |
| PM7.121707                                                                                                         | 121707 | LF/PP | Human      | PM7        | Feces  | Humanized generation 1 | 2,153     |
| PM8.121707                                                                                                         | 121707 | LF/PP | Human      | PM8        | Feces  | Humanized generation 1 | 1,767     |
| PM9.121707                                                                                                         | 121707 | LF/PP | Human      | PM9        | Feces  | Humanized generation 1 | 2,481     |
| PM1.10708                                                                                                          | 10708  | LF/PP | Human      | PM1        | Feces  | Humanized generation 1 | 979       |
| PM10.10708                                                                                                         | 10708  | LF/PP | Human      | PM10       | Feces  | Humanized generation 1 | 2,568     |
| PM11.10708                                                                                                         | 10708  | LF/PP | Human      | PM11       | Feces  | Humanized generation 1 | 2,798     |
| PM12.10708                                                                                                         | 10708  | LF/PP | Human      | PM12       | Feces  | Humanized generation 1 | 2,561     |
| PM2.10708                                                                                                          | 10708  | LF/PP | Human      | PM2        | Feces  | Humanized generation 1 | 1,851     |
| PM3.10708                                                                                                          | 10708  | LF/PP | Human      | PM3        | Feces  | Humanized generation 1 | 1,913     |
| PM4.10708                                                                                                          | 10708  | LF/PP | Human      | PM4        | Feces  | Humanized generation 1 | 1,699     |
| PM5.10708                                                                                                          | 10708  | LF/PP | Human      | PM5        | Feces  | Humanized generation 1 | 1,867     |
| PM6.10708                                                                                                          | 10708  | LF/PP | Human      | PM6        | Feces  | Humanized generation 1 | 2,828     |
| PM8.10708                                                                                                          | 10708  | LF/PP | Human      | PM8        | Feces  | Humanized generation 1 | 1,996     |
| PM9.10708                                                                                                          | 10708  | LF/PP | Human      | PM9        | Feces  | Humanized generation 1 | 2,100     |
| PM1.10808                                                                                                          | 10808  | LF/PP | Human      | PM1        | Feces  | Humanized generation 1 | 1,897     |
| PM11.10808                                                                                                         | 10808  | LF/PP | Human      | PM11       | Feces  | Humanized generation 1 | 2,932     |
| PM2.10808                                                                                                          | 10808  | LF/PP | Human      | PM2        | Feces  | Humanized generation 1 | 1,782     |
| PM3.10808                                                                                                          | 10808  | LF/PP | Human      | PM3        | Feces  | Humanized generation 1 | 2,054     |
| PM4.10808                                                                                                          | 10808  | LF/PP | Human      | PM4        | Feces  | Humanized generation 1 | 2,155     |
| PM1.11408                                                                                                          | 11408  | LF/PP | Human      | PM1        | Feces  | Humanized generation 1 | 2,809     |
| PM11.11408                                                                                                         | 11408  | LF/PP | Human      | PM11       | Feces  | Humanized generation 1 | 2,685     |
| PM2.11408                                                                                                          | 11408  | LF/PP | Human      | PM2        | Feces  | Humanized generation 1 | 3,014     |
| PM3.11408                                                                                                          | 11408  | LF/PP | Human      | PM3        | Feces  | Humanized generation 1 | 1,993     |
| PM4.11408                                                                                                          | 11408  | LF/PP | Human      | PM4        | Feces  | Humanized generation 1 | 2,268     |
| PM7.11408                                                                                                          | 11408  | LF/PP | Human      | PM7        | Feces  | Humanized generation 1 | 2,473     |
| PM1.12108                                                                                                          | 12108  | LF/PP | Human      | PM1        | Feces  | Humanized generation 1 | 2,114     |
| PM11.12108                                                                                                         | 12108  | LF/PP | Human      | PM11       | Feces  | Humanized generation 1 | 2,590     |
| PM2.12108                                                                                                          | 12108  | LF/PP | Human      | PM2        | Feces  | Humanized generation 1 | 2,358     |
| PM3.12108                                                                                                          | 12108  | LF/PP | Human      | PM3        | Feces  | Humanized generation 1 | 2,137     |
| PM4.12108                                                                                                          | 12108  | LF/PP | Human      | PM4        | Feces  | Humanized generation 1 | 2,108     |
| PM7.12108                                                                                                          | 12108  | LF/PP | Human      | PM7        | Feces  | Humanized generation 1 | 2,142     |
| PM1.12808                                                                                                          | 12808  | LF/PP | Human      | PM1        | Feces  | Humanized generation 1 | 2,761     |
| PM11.12808                                                                                                         | 12808  | LF/PP | Human      | PM11       | Feces  | Humanized generation 1 | 3,224     |
| PM2.12808                                                                                                          | 12808  | LF/PP | Human      | PM2        | Feces  | Humanized generation 1 | 2,057     |
| PM3.12808                                                                                                          | 12808  | LF/PP | Human      | PM3        | Feces  | Humanized generation 1 | 2,753     |
| PM4.12808                                                                                                          | 12808  | LF/PP | Human      | PM4        | Feces  | Humanized generation 1 | 3,075     |
| PM7.12808                                                                                                          | 12808  | LF/PP | Human      | PM7        | Feces  | Humanized generation 1 | 2,823     |

|              |       |         |       |      |       |                        |       |
|--------------|-------|---------|-------|------|-------|------------------------|-------|
| PM1.20408    | 20408 | LF/PP   | Human | PM1  | Feces | Humanized generation 1 | 2,941 |
| PM11.20408   | 20408 | LF/PP   | Human | PM11 | Feces | Humanized generation 1 | 2,684 |
| PM2.20408    | 20408 | LF/PP   | Human | PM2  | Feces | Humanized generation 1 | 1,875 |
| PM3.20408    | 20408 | LF/PP   | Human | PM3  | Feces | Humanized generation 1 | 2,114 |
| PM4.20408    | 20408 | LF/PP   | Human | PM4  | Feces | Humanized generation 1 | 1,797 |
| PM7.20408    | 20408 | LF/PP   | Human | PM7  | Feces | Humanized generation 1 | 2,376 |
| PM1.21108    | 21108 | LF/PP   | Human | PM1  | Feces | Humanized generation 1 | 2,225 |
| PM11.21108   | 21108 | LF/PP   | Human | PM11 | Feces | Humanized generation 1 | 2,586 |
| PM2.21108    | 21108 | LF/PP   | Human | PM2  | Feces | Humanized generation 1 | 2,138 |
| PM3.21108    | 21108 | LF/PP   | Human | PM3  | Feces | Humanized generation 1 | 1,907 |
| PM4.21108    | 21108 | LF/PP   | Human | PM4  | Feces | Humanized generation 1 | 2,154 |
| PM7.21108    | 21108 | LF/PP   | Human | PM7  | Feces | Humanized generation 1 | 2,003 |
| PM1.21808    | 21808 | LF/PP   | Human | PM1  | Feces | Humanized generation 1 | 1,558 |
| PM11.21808   | 21808 | LF/PP   | Human | PM11 | Feces | Humanized generation 1 | 2,626 |
| PM2.21808    | 21808 | LF/PP   | Human | PM2  | Feces | Humanized generation 1 | 3,577 |
| PM3.21808    | 21808 | LF/PP   | Human | PM3  | Feces | Humanized generation 1 | 1,386 |
| PM4.21808    | 21808 | LF/PP   | Human | PM4  | Feces | Humanized generation 1 | 2,357 |
| PM7.21808    | 21808 | LF/PP   | Human | PM7  | Feces | Humanized generation 1 | 2,249 |
| PM1.22508    | 22508 | LF/PP   | Human | PM1  | Feces | Humanized generation 1 | 2,466 |
| PM11.22508   | 22508 | LF/PP   | Human | PM11 | Feces | Humanized generation 1 | 2,529 |
| PM2.22508    | 22508 | LF/PP   | Human | PM2  | Feces | Humanized generation 1 | 2,947 |
| PM3.22508    | 22508 | LF/PP   | Human | PM3  | Feces | Humanized generation 1 | 2,485 |
| PM4.22508    | 22508 | LF/PP   | Human | PM4  | Feces | Humanized generation 1 | 2,348 |
| PM7.22508    | 22508 | LF/PP   | Human | PM7  | Feces | Humanized generation 1 | 2,530 |
| PM1.30308    | 30308 | LF/PP   | Human | PM1  | Feces | Humanized generation 1 | 1,345 |
| PM1.C.30308  | 30308 | LF/PP   | Human | PM1  | Cecum | Humanized generation 1 | 2,403 |
| PM11.30308   | 30308 | LF/PP   | Human | PM11 | Feces | Humanized generation 1 | 2,591 |
| PM2.30308    | 30308 | LF/PP   | Human | PM2  | Feces | Humanized generation 1 | 2,199 |
| PM2.C.30308  | 30308 | LF/PP   | Human | PM2  | Cecum | Humanized generation 1 | 2,906 |
| PM2.CL.30308 | 30308 | LF/PP   | Human | PM2  | Cecum | Humanized generation 1 | 2,615 |
| PM3.30308    | 30308 | LF/PP   | Human | PM3  | Feces | Humanized generation 1 | 1,798 |
| PM3.C.30308  | 30308 | LF/PP   | Human | PM3  | Cecum | Humanized generation 1 | 2,386 |
| PM3.CL.30308 | 30308 | LF/PP   | Human | PM3  | Cecum | Humanized generation 1 | 2,271 |
| PM4.30308    | 30308 | LF/PP   | Human | PM4  | Feces | Humanized generation 1 | 2,833 |
| PM4.C.30308  | 30308 | LF/PP   | Human | PM4  | Cecum | Humanized generation 1 | 2,296 |
| PM4.CL.30308 | 30308 | LF/PP   | Human | PM4  | Cecum | Humanized generation 1 | 2,132 |
| PM7.30308    | 30308 | LF/PP   | Human | PM7  | Feces | Humanized generation 1 | 2,435 |
| PM7.C.30308  | 30308 | LF/PP   | Human | PM7  | Cecum | Humanized generation 1 | 2,266 |
| PM7.CL.30308 | 30308 | LF/PP   | Human | PM7  | Cecum | Humanized generation 1 | 2,591 |
| PM10.10808   | 10808 | Western | Human | PM10 | Feces | Humanized generation 1 | 2,226 |
| PM12.10808   | 10808 | Western | Human | PM12 | Feces | Humanized generation 1 | 2,479 |
| PM5.10808    | 10808 | Western | Human | PM5  | Feces | Humanized generation 1 | 2,519 |
| PM6.10808    | 10808 | Western | Human | PM6  | Feces | Humanized generation 1 | 2,818 |
| PM8.10808    | 10808 | Western | Human | PM8  | Feces | Humanized generation 1 | 2,762 |
| PM9.10808    | 10808 | Western | Human | PM9  | Feces | Humanized generation 1 | 2,334 |
| PM10.11408   | 11408 | Western | Human | PM10 | Feces | Humanized generation 1 | 2,160 |
| PM12.11408   | 11408 | Western | Human | PM12 | Feces | Humanized generation 1 | 2,283 |
| PM5.11408    | 11408 | Western | Human | PM5  | Feces | Humanized generation 1 | 2,391 |
| PM6.11408    | 11408 | Western | Human | PM6  | Feces | Humanized generation 1 | 2,203 |
| PM8.11408    | 11408 | Western | Human | PM8  | Feces | Humanized generation 1 | 2,176 |
| PM9.11408    | 11408 | Western | Human | PM9  | Feces | Humanized generation 1 | 2,072 |
| PM10.12108   | 12108 | Western | Human | PM10 | Feces | Humanized generation 1 | 2,093 |
| PM12.12108   | 12108 | Western | Human | PM12 | Feces | Humanized generation 1 | 2,509 |
| PM5.12108    | 12108 | Western | Human | PM5  | Feces | Humanized generation 1 | 1,778 |
| PM6.12108    | 12108 | Western | Human | PM6  | Feces | Humanized generation 1 | 1,853 |
| PM8.12108    | 12108 | Western | Human | PM8  | Feces | Humanized generation 1 | 2,020 |
| PM9.12108    | 12108 | Western | Human | PM9  | Feces | Humanized generation 1 | 2,090 |
| PM10.12808   | 12808 | Western | Human | PM10 | Feces | Humanized generation 1 | 2,423 |
| PM12.12808   | 12808 | Western | Human | PM12 | Feces | Humanized generation 1 | 3,076 |
| PM5.12808    | 12808 | Western | Human | PM5  | Feces | Humanized generation 1 | 3,079 |
| PM6.12808    | 12808 | Western | Human | PM6  | Feces | Humanized generation 1 | 2,166 |
| PM8.12808    | 12808 | Western | Human | PM8  | Feces | Humanized generation 1 | 2,015 |
| PM9.12808    | 12808 | Western | Human | PM9  | Feces | Humanized generation 1 | 2,624 |

|                |       |         |         |      |       |                        |       |
|----------------|-------|---------|---------|------|-------|------------------------|-------|
| PM10.20408     | 20408 | Western | Human   | PM10 | Feces | Humanized generation 1 | 1,908 |
| PM12.20408     | 20408 | Western | Human   | PM12 | Feces | Humanized generation 1 | 2,342 |
| PM5.20408      | 20408 | Western | Human   | PM5  | Feces | Humanized generation 1 | 2,011 |
| PM6.20408      | 20408 | Western | Human   | PM6  | Feces | Humanized generation 1 | 2,278 |
| PM8.20408      | 20408 | Western | Human   | PM8  | Feces | Humanized generation 1 | 2,333 |
| PM9.20408      | 20408 | Western | Human   | PM9  | Feces | Humanized generation 1 | 2,274 |
| PM10.21108     | 21108 | Western | Human   | PM10 | Feces | Humanized generation 1 | 2,003 |
| PM12.21108     | 21108 | Western | Human   | PM12 | Feces | Humanized generation 1 | 2,424 |
| PM5.21108      | 21108 | Western | Human   | PM5  | Feces | Humanized generation 1 | 1,570 |
| PM6.21108      | 21108 | Western | Human   | PM6  | Feces | Humanized generation 1 | 1,729 |
| PM8.21108      | 21108 | Western | Human   | PM8  | Feces | Humanized generation 1 | 1,901 |
| PM9.21108      | 21108 | Western | Human   | PM9  | Feces | Humanized generation 1 | 1,763 |
| PM10.21808     | 21808 | Western | Human   | PM10 | Feces | Humanized generation 1 | 1,559 |
| PM12.21808     | 21808 | Western | Human   | PM12 | Feces | Humanized generation 1 | 1,878 |
| PM5.21808      | 21808 | Western | Human   | PM5  | Feces | Humanized generation 1 | 2,537 |
| PM6.21808      | 21808 | Western | Human   | PM6  | Feces | Humanized generation 1 | 2,206 |
| PM8.21808      | 21808 | Western | Human   | PM8  | Feces | Humanized generation 1 | 3,709 |
| PM9.21808      | 21808 | Western | Human   | PM9  | Feces | Humanized generation 1 | 1,694 |
| PM10.22508     | 22508 | Western | Human   | PM10 | Feces | Humanized generation 1 | 2,552 |
| PM12.22508     | 22508 | Western | Human   | PM12 | Feces | Humanized generation 1 | 2,238 |
| PM5.22508      | 22508 | Western | Human   | PM5  | Feces | Humanized generation 1 | 2,287 |
| PM6.22508      | 22508 | Western | Human   | PM6  | Feces | Humanized generation 1 | 2,267 |
| PM8.22508      | 22508 | Western | Human   | PM8  | Feces | Humanized generation 1 | 2,535 |
| PM9.22508      | 22508 | Western | Human   | PM9  | Feces | Humanized generation 1 | 2,911 |
| PM10.30308     | 30308 | Western | Human   | PM10 | Feces | Humanized generation 1 | 2,222 |
| PM12.30308     | 30308 | Western | Human   | PM12 | Feces | Humanized generation 1 | 2,361 |
| PM5.30308      | 30308 | Western | Human   | PM5  | Feces | Humanized generation 1 | 2,340 |
| PM5.C.30308    | 30308 | Western | Human   | PM5  | Cecum | Humanized generation 1 | 2,070 |
| PM5.CL.30308   | 30308 | Western | Human   | PM5  | Cecum | Humanized generation 1 | 2,045 |
| PM6.30308      | 30308 | Western | Human   | PM6  | Feces | Humanized generation 1 | 2,635 |
| PM6.C.30308    | 30308 | Western | Human   | PM6  | Cecum | Humanized generation 1 | 2,180 |
| PM8.30308      | 30308 | Western | Human   | PM8  | Feces | Humanized generation 1 | 2,428 |
| PM8.C.30308    | 30308 | Western | Human   | PM8  | Cecum | Humanized generation 1 | 2,225 |
| PM8.CL.30308   | 30308 | Western | Human   | PM8  | Cecum | Humanized generation 1 | 4,222 |
| PM9.30308      | 30308 | Western | Human   | PM9  | Feces | Humanized generation 1 | 1,838 |
| SPM1.03.04.08  | 30408 | LF/PP   | LF/PP   | SPM1 | Feces | Humanized generation 2 | 1,683 |
| SPM5.03.04.08  | 30408 | LF/PP   | LF/PP   | SPM5 | Feces | Humanized generation 2 | 1,706 |
| SPM6.03.04.08  | 30408 | LF/PP   | LF/PP   | SPM6 | Feces | Humanized generation 2 | 996   |
| SPM1.03.11.08  | 31108 | LF/PP   | LF/PP   | SPM1 | Feces | Humanized generation 2 | 1,389 |
| SPM5.03.11.08  | 31108 | LF/PP   | LF/PP   | SPM5 | Feces | Humanized generation 2 | 1,629 |
| SPM6.03.11.08  | 31108 | LF/PP   | LF/PP   | SPM6 | Feces | Humanized generation 2 | 1,569 |
| SPM1.03.18.08  | 31808 | LF/PP   | LF/PP   | SPM1 | Feces | Humanized generation 2 | 1,797 |
| SPM6.03.18.08  | 31808 | LF/PP   | LF/PP   | SPM6 | Feces | Humanized generation 2 | 1,815 |
| SPM1.03.19.08  | 31908 | LF/PP   | LF/PP   | SPM1 | Feces | Humanized generation 2 | 1,914 |
| SPM5.03.19.08  | 31908 | LF/PP   | LF/PP   | SPM5 | Feces | Humanized generation 2 | 1,778 |
| SPM6.03.19.08  | 31908 | LF/PP   | LF/PP   | SPM6 | Feces | Humanized generation 2 | 1,967 |
| SPM1.03.25.08  | 32508 | LF/PP   | LF/PP   | SPM1 | Feces | Humanized generation 2 | 2,020 |
| SPM5.03.25.08  | 32508 | LF/PP   | LF/PP   | SPM5 | Feces | Humanized generation 2 | 2,082 |
| SPM6.03.25.08  | 32508 | LF/PP   | LF/PP   | SPM6 | Feces | Humanized generation 2 | 2,071 |
| SPM1.04.01.08  | 40108 | LF/PP   | LF/PP   | SPM1 | Feces | Humanized generation 2 | 2,087 |
| SPM1c.04.01.08 | 40108 | LF/PP   | LF/PP   | SPM1 | Cecum | Humanized generation 2 | 1,030 |
| SPM5.04.01.08  | 40108 | LF/PP   | LF/PP   | SPM5 | Feces | Humanized generation 2 | 2,230 |
| SPM5c.04.01.08 | 40108 | LF/PP   | LF/PP   | SPM5 | Cecum | Humanized generation 2 | 1,386 |
| SPM6.04.01.08  | 40108 | LF/PP   | LF/PP   | SPM6 | Feces | Humanized generation 2 | 2,070 |
| SPM6c.04.01.08 | 40108 | LF/PP   | LF/PP   | SPM6 | Cecum | Humanized generation 2 | 1,627 |
| SPM3.03.04.08  | 30408 | LF/PP   | Western | SPM3 | Feces | Humanized generation 2 | 1,625 |
| SPM9.03.04.08  | 30408 | LF/PP   | Western | SPM9 | Feces | Humanized generation 2 | 1,889 |
| SPM3.03.11.08  | 31108 | LF/PP   | Western | SPM3 | Feces | Humanized generation 2 | 1,779 |
| SPM4.03.11.08  | 31108 | LF/PP   | Western | SPM4 | Feces | Humanized generation 2 | 1,403 |
| SPM7.03.11.08  | 31108 | LF/PP   | Western | SPM7 | Feces | Humanized generation 2 | 1,745 |
| SPM8.03.11.08  | 31108 | LF/PP   | Western | SPM8 | Feces | Humanized generation 2 | 1,591 |
| SPM9.03.11.08  | 31108 | LF/PP   | Western | SPM9 | Feces | Humanized generation 2 | 1,714 |
| SPM3.03.18.08  | 31808 | LF/PP   | Western | SPM3 | Feces | Humanized generation 2 | 1,831 |

|                 |       |         |         |       |       |                        |         |
|-----------------|-------|---------|---------|-------|-------|------------------------|---------|
| SPM4.03.18.08   | 31808 | LF/PP   | Western | SPM4  | Feces | Humanized generation 2 | 1,905   |
| SPM7.03.18.08   | 31808 | LF/PP   | Western | SPM7  | Feces | Humanized generation 2 | 1,834   |
| SPM9.03.18.08   | 31808 | LF/PP   | Western | SPM9  | Feces | Humanized generation 2 | 1,875   |
| SPM3.03.19.08   | 31908 | LF/PP   | Western | SPM3  | Feces | Humanized generation 2 | 1,901   |
| SPM4.03.19.08   | 31908 | LF/PP   | Western | SPM4  | Feces | Humanized generation 2 | 1,883   |
| SPM7.03.19.08   | 31908 | LF/PP   | Western | SPM7  | Feces | Humanized generation 2 | 2,058   |
| SPM8.03.19.08   | 31908 | LF/PP   | Western | SPM8  | Feces | Humanized generation 2 | 1,980   |
| SPM3.03.25.08   | 32508 | LF/PP   | Western | SPM3  | Feces | Humanized generation 2 | 1,880   |
| SPM4.03.25.08   | 32508 | LF/PP   | Western | SPM4  | Feces | Humanized generation 2 | 2,074   |
| SPM7.03.25.08   | 32508 | LF/PP   | Western | SPM7  | Feces | Humanized generation 2 | 2,095   |
| SPM8.03.25.08   | 32508 | LF/PP   | Western | SPM8  | Feces | Humanized generation 2 | 2,119   |
| SPM9.03.25.08   | 32508 | LF/PP   | Western | SPM9  | Feces | Humanized generation 2 | 2,185   |
| SPM3.04.01.08   | 40108 | LF/PP   | Western | SPM3  | Feces | Humanized generation 2 | 2,099   |
| SPM3c.04.01.08  | 40108 | LF/PP   | Western | SPM3  | Cecum | Humanized generation 2 | 1,294   |
| SPM4.04.01.08   | 40108 | LF/PP   | Western | SPM4  | Feces | Humanized generation 2 | 2,144   |
| SPM4c.04.01.08  | 40108 | LF/PP   | Western | SPM4  | Cecum | Humanized generation 2 | 1,396   |
| SPM7.04.01.08   | 40108 | LF/PP   | Western | SPM7  | Feces | Humanized generation 2 | 1,790   |
| SPM7c.04.01.08  | 40108 | LF/PP   | Western | SPM7  | Cecum | Humanized generation 2 | 1,392   |
| SPM8.04.01.08   | 40108 | LF/PP   | Western | SPM8  | Feces | Humanized generation 2 | 2,122   |
| SPM8c.04.01.08  | 40108 | LF/PP   | Western | SPM8  | Cecum | Humanized generation 2 | 1,442   |
| SPM9.04.01.08   | 40108 | LF/PP   | Western | SPM9  | Feces | Humanized generation 2 | 2,066   |
| SPM9c.04.01.08  | 40108 | LF/PP   | Western | SPM9  | Cecum | Humanized generation 2 | 1,009   |
| SPM10.03.04.08  | 30408 | Western | LF/PP   | SPM10 | Feces | Humanized generation 2 | 1,702   |
| SPM11.03.04.08  | 30408 | Western | LF/PP   | SPM11 | Feces | Humanized generation 2 | 1,897   |
| SPM12.03.04.08  | 30408 | Western | LF/PP   | SPM12 | Feces | Humanized generation 2 | 1,409   |
| SPM10.03.11.08  | 31108 | Western | LF/PP   | SPM10 | Feces | Humanized generation 2 | 1,883   |
| SPM11.03.11.08  | 31108 | Western | LF/PP   | SPM11 | Feces | Humanized generation 2 | 1,972   |
| SPM12.03.11.08  | 31108 | Western | LF/PP   | SPM12 | Feces | Humanized generation 2 | 1,837   |
| SPM10.03.18.08  | 31808 | Western | LF/PP   | SPM10 | Feces | Humanized generation 2 | 1,832   |
| SPM11.03.18.08  | 31808 | Western | LF/PP   | SPM11 | Feces | Humanized generation 2 | 1,839   |
| SPM12.03.18.08  | 31808 | Western | LF/PP   | SPM12 | Feces | Humanized generation 2 | 1,825   |
| SPM10.03.19.08  | 31908 | Western | LF/PP   | SPM10 | Feces | Humanized generation 2 | 1,915   |
| SPM11.03.19.08  | 31908 | Western | LF/PP   | SPM11 | Feces | Humanized generation 2 | 1,976   |
| SPM12.03.19.08  | 31908 | Western | LF/PP   | SPM12 | Feces | Humanized generation 2 | 2,062   |
| SPM10.03.25.08  | 32508 | Western | LF/PP   | SPM10 | Feces | Humanized generation 2 | 2,074   |
| SPM11.03.25.08  | 32508 | Western | LF/PP   | SPM11 | Feces | Humanized generation 2 | 2,051   |
| SPM12.03.25.08  | 32508 | Western | LF/PP   | SPM12 | Feces | Humanized generation 2 | 1,942   |
| SPM10.04.01.08  | 40108 | Western | LF/PP   | SPM10 | Feces | Humanized generation 2 | 2,203   |
| SPM10c.04.01.08 | 40108 | Western | LF/PP   | SPM10 | Cecum | Humanized generation 2 | 1,440   |
| SPM11.04.01.08  | 40108 | Western | LF/PP   | SPM11 | Feces | Humanized generation 2 | 2,119   |
| SPM11c.04.01.08 | 40108 | Western | LF/PP   | SPM11 | Cecum | Humanized generation 2 | 1,217   |
| SPM12.04.01.08  | 40108 | Western | LF/PP   | SPM12 | Feces | Humanized generation 2 | 1,855   |
| SPM12c.04.01.08 | 40108 | Western | LF/PP   | SPM12 | Cecum | Humanized generation 2 | 1,212   |
| SPM17.03.04.08  | 30408 | Western | Western | SPM17 | Feces | Humanized generation 2 | 1,826   |
| SPM15.03.11.08  | 31108 | Western | Western | SPM15 | Feces | Humanized generation 2 | 1,689   |
| SPM17.03.11.08  | 31108 | Western | Western | SPM17 | Feces | Humanized generation 2 | 1,994   |
| SPM18.03.11.08  | 31108 | Western | Western | SPM18 | Feces | Humanized generation 2 | 1,917   |
| SPM15.03.18.08  | 31808 | Western | Western | SPM15 | Feces | Humanized generation 2 | 1,765   |
| SPM17.03.18.08  | 31808 | Western | Western | SPM17 | Feces | Humanized generation 2 | 1,898   |
| SPM18.03.18.08  | 31808 | Western | Western | SPM18 | Feces | Humanized generation 2 | 1,681   |
| SPM15.03.19.08  | 31908 | Western | Western | SPM15 | Feces | Humanized generation 2 | 2,131   |
| SPM17.03.19.08  | 31908 | Western | Western | SPM17 | Feces | Humanized generation 2 | 1,789   |
| SPM15.03.25.08  | 32508 | Western | Western | SPM15 | Feces | Humanized generation 2 | 1,792   |
| SPM17.03.25.08  | 32508 | Western | Western | SPM17 | Feces | Humanized generation 2 | 2,026   |
| SPM18.03.25.08  | 32508 | Western | Western | SPM18 | Feces | Humanized generation 2 | 1,872   |
| SPM15.04.01.08  | 40108 | Western | Western | SPM15 | Feces | Humanized generation 2 | 1,373   |
| SPM15c.04.01.08 | 40108 | Western | Western | SPM15 | Cecum | Humanized generation 2 | 1,338   |
| SPM17.04.01.08  | 40108 | Western | Western | SPM17 | Feces | Humanized generation 2 | 1,817   |
| SPM17c.04.01.08 | 40108 | Western | Western | SPM17 | Cecum | Humanized generation 2 | 1,031   |
| SPM18.04.01.08  | 40108 | Western | Western | SPM18 | Feces | Humanized generation 2 | 1,438   |
| SPM18c.04.01.08 | 40108 | Western | Western | SPM18 | Cecum | Humanized generation 2 | 1,315   |
| <b>SUM</b>      | -     | -       |         | -     | -     | -                      | 530,030 |
