# Supplementary material
Source: PubMed Central journal article supplement (PMC2894525)
Supplement: NIHMS209492-supplement-11.pdf [file NIHMS209492-supplement-11.pdf]

**Table S8. Microbiome sequencing statistics (fecal samples).**

| Figure label                | MID   | Data label | Diet group | Date of collection | Total bp    | Number reads | Filtered reads <sup>a</sup> | Description                       |
|-----------------------------|-------|------------|------------|--------------------|-------------|--------------|-----------------------------|-----------------------------------|
| LF/PP 1dpc group1           | MID8  | BK12.11    | LF/PP      | 121107             | 9,192,572   | 41,596       | 35,228                      | 1 day post colonization           |
| LF/PP 7dpc group1           | MID10 | BK12.17    | LF/PP      | 121707             | 10,953,419  | 48,418       | 40,909                      | 1 week post colonization          |
| LF/PP 28dpc group1          | MID12 | BK1.7      | LF/PP      | 1708               | 7,635,202   | 34,657       | 29,089                      | 1 month post colonization         |
| LF/PP 29dpc group1          | MID3  | BK1.8      | LF/PP      | 1808               | 9,070,937   | 41,175       | 34,663                      | 4 wks and 1 day post colonization |
| LF/PP 35dpc group1          | MID5  | BK1.14     | LF/PP      | 11408              | 8,942,972   | 39,255       | 33,357                      | 5 wks post colonization           |
| LF/PP 1dpc group2           | MID9  | W12.11     | Western    | 121107             | 10,945,181  | 48,650       | 41,034                      | 1 day post colonization           |
| LF/PP 7dpc group2           | MID11 | W12.17     | Western    | 121707             | 8,844,180   | 39,099       | 33,143                      | 1 week post colonization          |
| LF/PP 28dpc group2          | MID1  | W1.7       | Western    | 1708               | 14,408,845  | 62,604       | 52,559                      | 1 month post colonization         |
| Western 1dpc (29dpc) group2 | MID4  | W1.8       | Western    | 1808               | 9,105,299   | 41,129       | 34,385                      | 1 day post diet switch            |
| Western 7dpc (35dpc) group2 | MID6  | W1.14      | Western    | 11408              | 9,074,582   | 42,024       | 35,308                      | 1 week post diet switch           |
| Donor                       | MID7  | PD2G       | Donor      | 121007             | 9,275,519   | 40,888       | 34,538                      | Human donor sample                |
| <b>SUM</b>                  | -     | -          | -          | -                  | 107,448,708 | 479,495      | 404,213                     |                                   |

<sup>a</sup>Sequences remaining after removing low quality and replicate sequences (see *Supplementary Methods*).
